# Supplementary material for: Validation of a Deep Learning Model for Diabetic Retinopathy on Patients with Young-Onset Diabetes
Source: Springer Nature journal article supplement (doi:10.1007/s40123-025-01116-z), 2025-03-14
Supplement: MOESM1 [file 40123_2025_1116_MOESM1_ESM.pdf]

## Supplementary Material:

### Validation of a Deep Learning Model for Diabetic Retinopathy on Patients with Young-Onset Diabetes

#### Authors

Antonio Tan-Torres III MS<sup>1</sup>, Pradeep A Praveen MPH, PhD<sup>2,3</sup>, Divleen Jeji MBBS MBA<sup>1</sup>, Arthur Brant MD<sup>4</sup>, Xiang Yin PhD<sup>1</sup>, Lu Yang BS<sup>1</sup>, Preeti Singh MS<sup>1</sup>, Tayyeba Ali MD<sup>5</sup>, Ilana Traynis MD<sup>4</sup>, Dushyantsinh Jadeja BE<sup>1</sup>, Rajroshan Sawhney BE<sup>1</sup>, Dale R Webster PhD<sup>1</sup>, Naama Hammel MD<sup>1</sup>, Yun Liu PhD<sup>1</sup>, Kasumi Widner MS<sup>1</sup>, Sunny Virmani MS<sup>1</sup>, Pradeep Venkatesh MD<sup>2</sup>, Jonathan Krause PhD<sup>1</sup>, Nikhil Tandon MD, PhD<sup>2</sup>

#### Affiliations

<sup>1</sup>Google, Mountain View, CA, USA

<sup>2</sup>Department of Endocrinology and Metabolism, AIIMS, New Delhi, India

<sup>3</sup>Goa Institute of Management, Goa, India

<sup>4</sup>Work done at Google via Oregon Vision and Pharmacy LLC, Keizer, OR, USA

<sup>5</sup>Work done at Google via Vituity, Emeryville, CA, USA

Corresponding author: Yun Liu, [liuyun@google.com](mailto:liuyun@google.com)

Supplementary Figure 1: Flowchart of study workflow

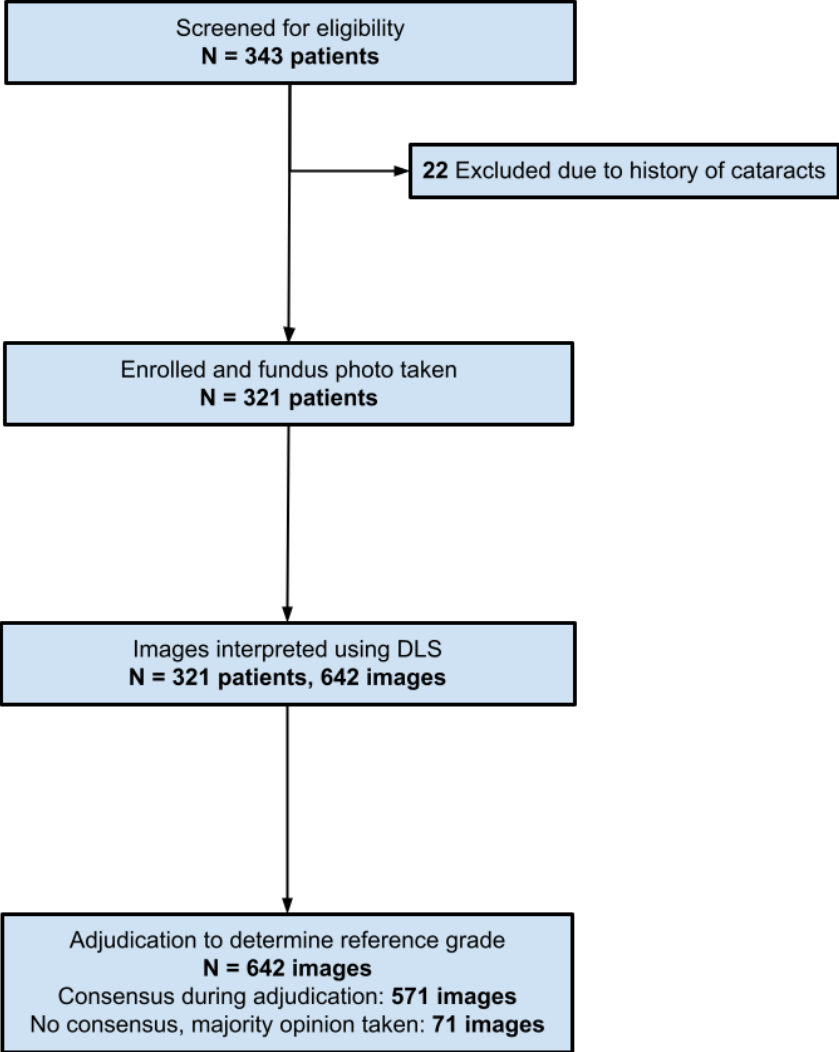

**Supplementary Table 1: Confusion matrices (2-by-2 contingency tables) for (A) moderate+ DR and (B) DME status, stratified by sheen presence.** DME sensitivity differs substantially based on sheen presence (70% for sheen-positive vs. 100% for sheen-negative).

**A. Moderate+ DR reference grade and model predictions**

| Sheen-positive (age mean 26.0, SD 6.1, 320 in younger cohort, 280 in older cohort) |              |              | Sheen-negative (age mean 33.3, SD 4.8, 1 in younger cohort, 33 in older cohort) |              |              |
|------------------------------------------------------------------------------------|--------------|--------------|---------------------------------------------------------------------------------|--------------|--------------|
|                                                                                    | Ref. grade + | Ref. grade - |                                                                                 | Ref. grade + | Ref. grade - |
| Predicted +                                                                        | 112          | 20           | Predicted +                                                                     | 21           | 3            |
| Predicted -                                                                        | 7            | 461          | Predicted -                                                                     | 0            | 10           |

**B. DME reference grade and model predictions**

| Sheen-positive (age mean 26.0, SD 6.1, 320 in younger cohort, 280 in older cohort) |              |              | Sheen-negative (age mean 33.4, SD 4.8, 1 in younger cohort, 34 in older cohort) |              |              |
|------------------------------------------------------------------------------------|--------------|--------------|---------------------------------------------------------------------------------|--------------|--------------|
|                                                                                    | Ref. grade + | Ref. grade - |                                                                                 | Ref. grade + | Ref. grade - |
| Predicted +                                                                        | 31           | 25           | Predicted +                                                                     | 14           | 6            |
| Predicted -                                                                        | 13           | 531          | Predicted -                                                                     | 0            | 15           |

**Supplementary Table 2: Multivariable analyses for model performance for (A) moderate+ DR and (B) DME status, stratified by sheen presence.** Bold indicates p<0.05. The strongest significant association observed was between sheen presence and specificity (for both moderate+ DR and DME). Examples were excluded if they had invalid/missing sheen or hba1c values.

**A. Moderate+ DR**

|                              |        | Sensitivity |                            |       | Specificity |                             |              |
|------------------------------|--------|-------------|----------------------------|-------|-------------|-----------------------------|--------------|
| Variable                     | Bucket | Counts      | Log odds (95% CI)          | P     | Counts      | Odds ratio (95% CI)         | P            |
| Hba1c (percentage)           | 4-8    | 52          | Ref.                       |       | 167         | Ref.                        |              |
|                              | 8-18   | 81          | 0.726 (-0.855, 2.31)       | 0.368 | 304         | -0.497 (-1.502, 0.507)      | 0.332        |
| Duration of diabetes (years) | 0-10   | 58          | Ref.                       |       | 144         | Ref.                        |              |
|                              | 10-20  | 57          | -0.041 (-1.738, 1.657)     | 0.963 | 233         | <b>1.023 (0.045, 2.001)</b> | <b>0.040</b> |
|                              | 20-40  | 18          | 0.091(-2.298, 2.479)       | 0.941 | 94          | 0.662 (-0.527, 1.852)       | 0.275        |
| Age (years)                  | >25    | 94          | Ref.                       |       | 199         | Ref.                        |              |
|                              | 18-25  | 39          | 1.283 (-0.896, 3.462)      | 0.249 | 272         | <b>1.246 (0.267, 2.226)</b> | <b>0.013</b> |
| Sheen presence               | No     | 20          | Ref.                       |       | 13          | Ref.                        |              |
|                              | Yes    | 113         | -11.530 (-487.19, 464.135) | 0.962 | 458         | <b>1.543 (0.039, 3.047)</b> | <b>0.044</b> |
| Sex                          | Female | 66          | Ref.                       |       | 238         | Ref.                        |              |
|                              | Male   | 67          | 1.027 (-0.689, 2.742)      | 0.241 | 233         | -0.129 (-1.001, 0.743)      | 0.772        |

\* 33 examples were excluded due to invalid/missing hba1c or sheen values

## B. DME

|                              |        | Sensitivity |                               |        | Specificity |                             |              |
|------------------------------|--------|-------------|-------------------------------|--------|-------------|-----------------------------|--------------|
| Variable                     | Bucket | Counts      | Log odds (95% CI)             | P      | Counts      | Odds ratio (95% CI)         | P            |
| Hba1c (percentage)           | 4-8    | 25          | Ref.                          |        | 195         | Ref.                        |              |
|                              | 8-18   | 31          | 0.756 (-0.690, 2.203)         | 0.305  | 354         | 0.348 (-0.438, 1.134)       | 0.386        |
| Duration of diabetes (years) | 0-10   | 22          | Ref.                          |        | 181         | Ref.                        |              |
|                              | 10-20  | 28          | 0.263 (-1.380, 1.906)         | 0.754  | 262         | 0.233 (-0.694, 1.160)       | 0.622        |
|                              | 20-40  | 6           | -1.420 (-3.730, 0.889)        | 0.228  | 106         | -0.699 (-1.65, 0.252)       | 0.150        |
| Age (years)                  | >25    | 38          | Ref.                          |        | 256         | Ref.                        |              |
|                              | 18-25  | 18          | 0.782 (-0.674, 2.238)         | 0.292  | 293         | <b>0.950 (0.080, 1.820)</b> | <b>0.032</b> |
| Sheen presence               | No     | 13          | Ref.                          |        | 21          | Ref.                        |              |
|                              | Yes    | 43          | -14.668 (-1045.883, 1016.547) | 0.9778 | 528         | <b>1.628 (0.522, 2.734)</b> | <b>0.004</b> |
| Sex                          | Female | 26          | Ref.                          |        | 278         | Ref.                        |              |
|                              | Male   | 30          | 0.0864 (-1.470, 1.643)        | 0.913  | 271         | 0.454 (-0.341, 1.249)       | 0.263        |

\* 31 examples were excluded due to invalid/missing hba1c or sheen values

**Supplementary Table 3: Patient-level model performance**

| <b>Endpoint</b>      | <b>Metric</b>                  | <b>Full cohort<br/>(ages 18-45),<br/>N = 321</b> | <b>Younger<br/>cohort (ages<br/>18-25)<br/>N = 162</b> | <b>Older cohort<br/>(ages 26-45)<br/>N = 159</b> | <b>P (younger<br/>vs. older<br/>cohort)</b> |
|----------------------|--------------------------------|--------------------------------------------------|--------------------------------------------------------|--------------------------------------------------|---------------------------------------------|
| Moderate-or-worse DR | Sensitivity                    | 94.4% [87.5, 97.6]                               | 100.0% [87.5, 100.0]                                   | 92.0% [82.5, 96.5]                               | 0.073                                       |
|                      | Specificity                    | 95.2% [91.6, 97.3]                               | 97.7% [93.6, 99.2]                                     | 91.7% [84.4, 95.7]                               | 0.033                                       |
| DME                  | Sensitivity                    | 76.7% [62.3, 86.9]                               | 78.6% [52.4, 92.4]                                     | 75.9% [57.9, 87.8]                               | 0.851                                       |
|                      | Specificity                    | 94.1% [90.7, 96.4]                               | 97.9% [94.1, 99.3]                                     | 89.8% [83.4, 94.0]                               | 0.003                                       |
| VTDR*                | Clinically Important Miss Rate | 7.41% [5.1, 21.8]                                | 4.0% [0.1, 25.8]                                       | 8.9% [5.9, 28.0]                                 | 0.420                                       |
| mtmDR*               | Sensitivity                    | 94.4% [87.5, 97.6]                               | 100.0% [87.5, 100.0]                                   | 91.9% [82.5, 96.5]                               | 0.066                                       |
|                      | Specificity                    | 94.8% [91.6, 97.3]                               | 97.7% [93.6, 99.2]                                     | 90.6% [84.3, 95.7]                               | 0.016                                       |

\*VTDR is severe NPDR, proliferative DR (PDR), or DME

\*mtmDR is moderate or severe NPDR or proliferative DR, or DME

**Supplementary Table 4: Confusion matrices (2-by-2 contingency tables) for (A) moderate+ DR vs sheen presence and (B) DME status vs sheen presence**

**A. DR Moderate+**

| DR Moderate+ | Sheen present | Sheen absent |
|--------------|---------------|--------------|
| Positive     | 119; 20%      | 21; 62%      |
| Negative     | 481; 80%      | 13; 38%      |

A 2-tailed Fisher's exact test yields  $p < 0.0001$ .

**B. DME**

| DME     | Sheen present | Sheen absent |
|---------|---------------|--------------|
| Present | 44; 7%        | 14; 40%      |
| Absent  | 556; 93%      | 21; 60%      |

A 2-tailed Fisher's exact test yields  $p < 0.0001$ .

**Supplementary Table 5.** Definitions of DR levels and DME.

| <b>Lesions</b>                          | <b>Grades</b>    |
|-----------------------------------------|------------------|
| No lesions                              | No DR            |
| Microaneurysms only                     | Mild             |
| Hemorrhages*                            | Moderate         |
| Hard exudates*                          |                  |
| Cotton wool spots*                      |                  |
| Focal laser scars                       |                  |
| Greater density/count of hemorrhages    | Severe           |
| Definite venous beading                 |                  |
| Prominent IRMAs                         |                  |
| Neovascularization at disc or elsewhere | Proliferative DR |
| Fibrovascular proliferation             |                  |
| Preretinal hemorrhage                   |                  |
| Vitreous hemorrhage                     |                  |
| Tractional retinal detachment           |                  |
| Panretinal photocoagulation scars       |                  |
| Hard exudates* within 1 disc diameter   | DME              |

\* Requires the presence of MA
